# Supplementary material
Source: publisher site journal article supplement (https://www.dovepress.com/article/552418)
Supplement: Supplementary file 1 [file Si.docx]

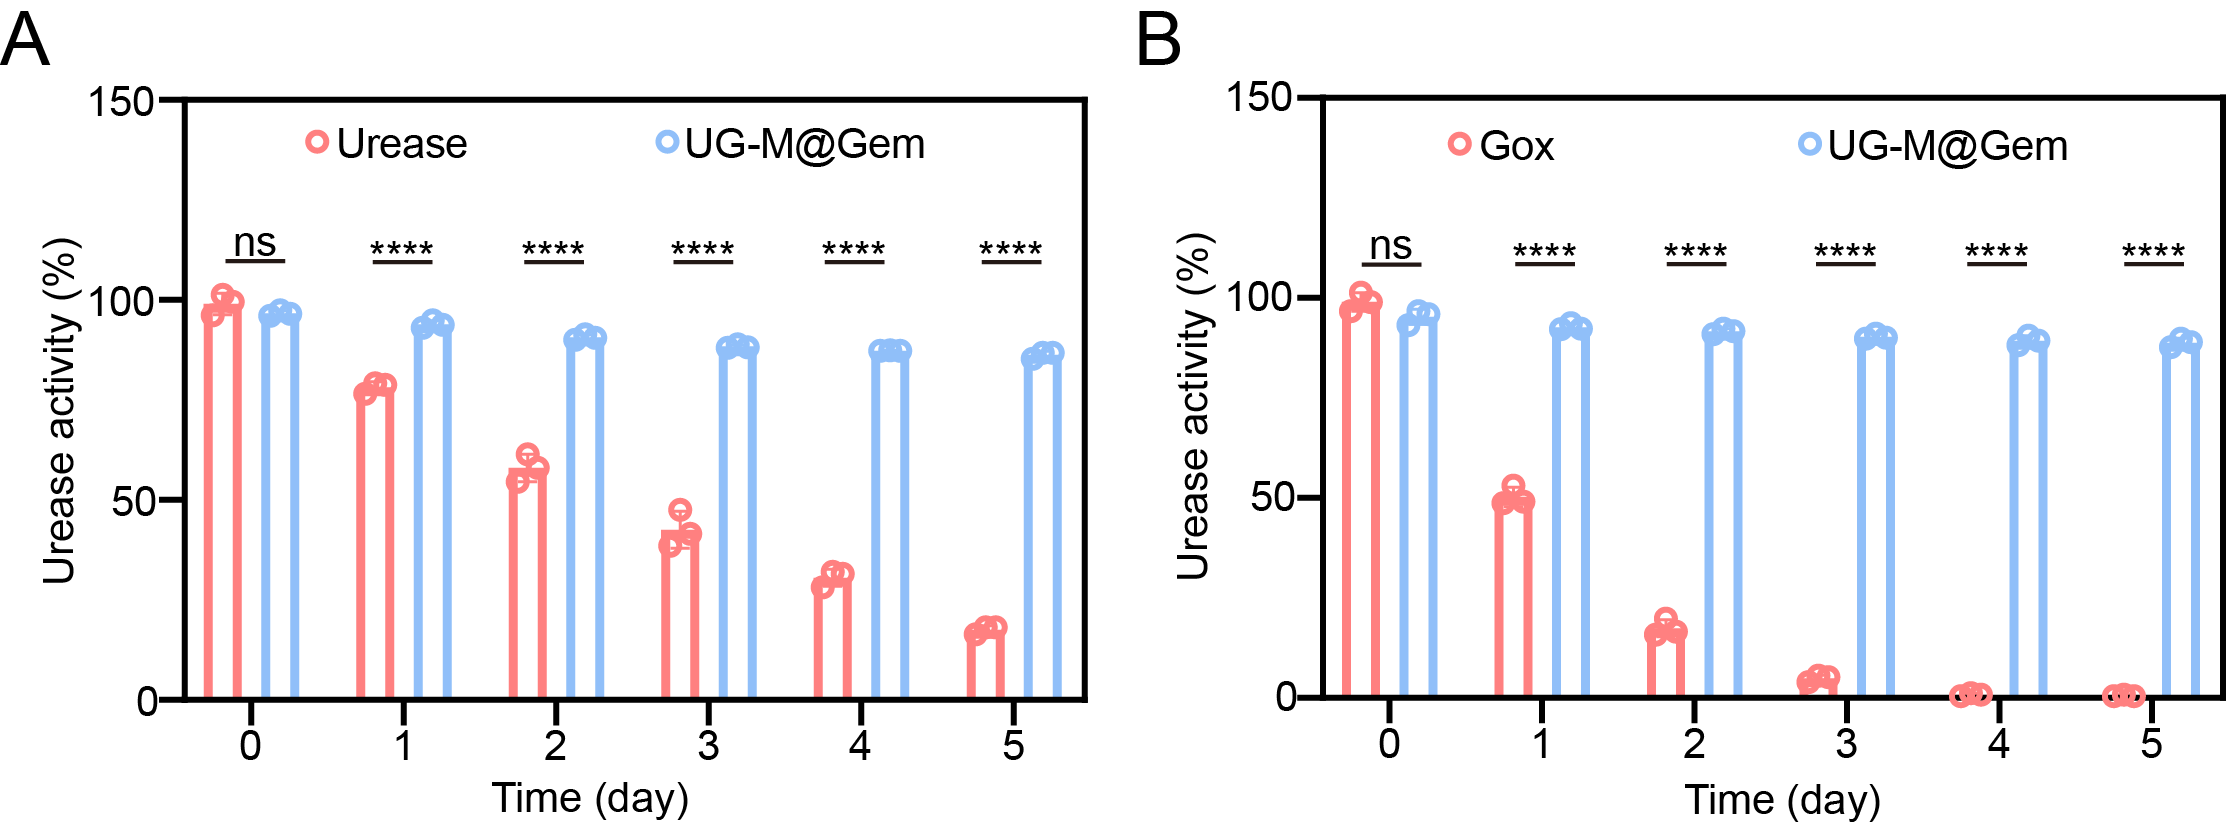


Figure S1 The enzyme activity of free urease and urease in UG-M@Gem was measured at different time points. **** *p* < 0.0001, ns indicate *P* > 0.05.


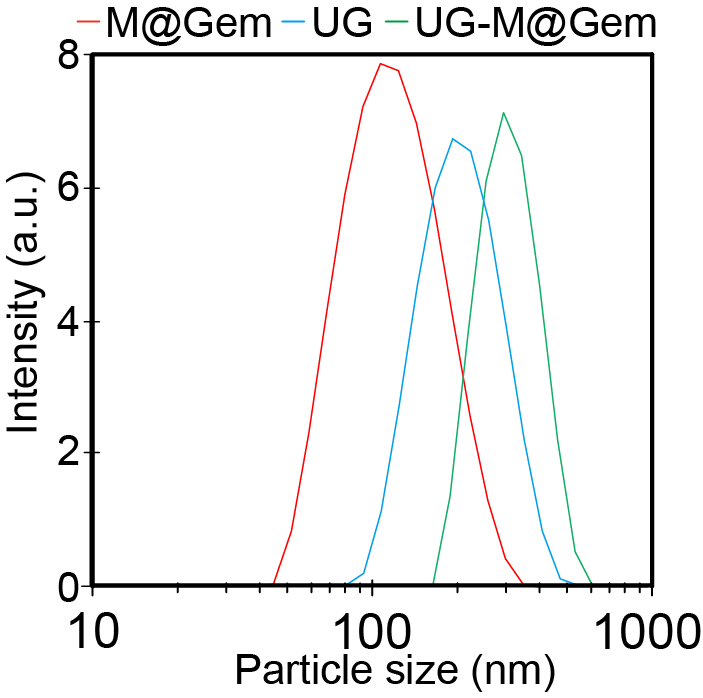


Figure S2 Size distribution of M@Gem, UG and UG-M@Gem, analyzed by dynamic light scattering.


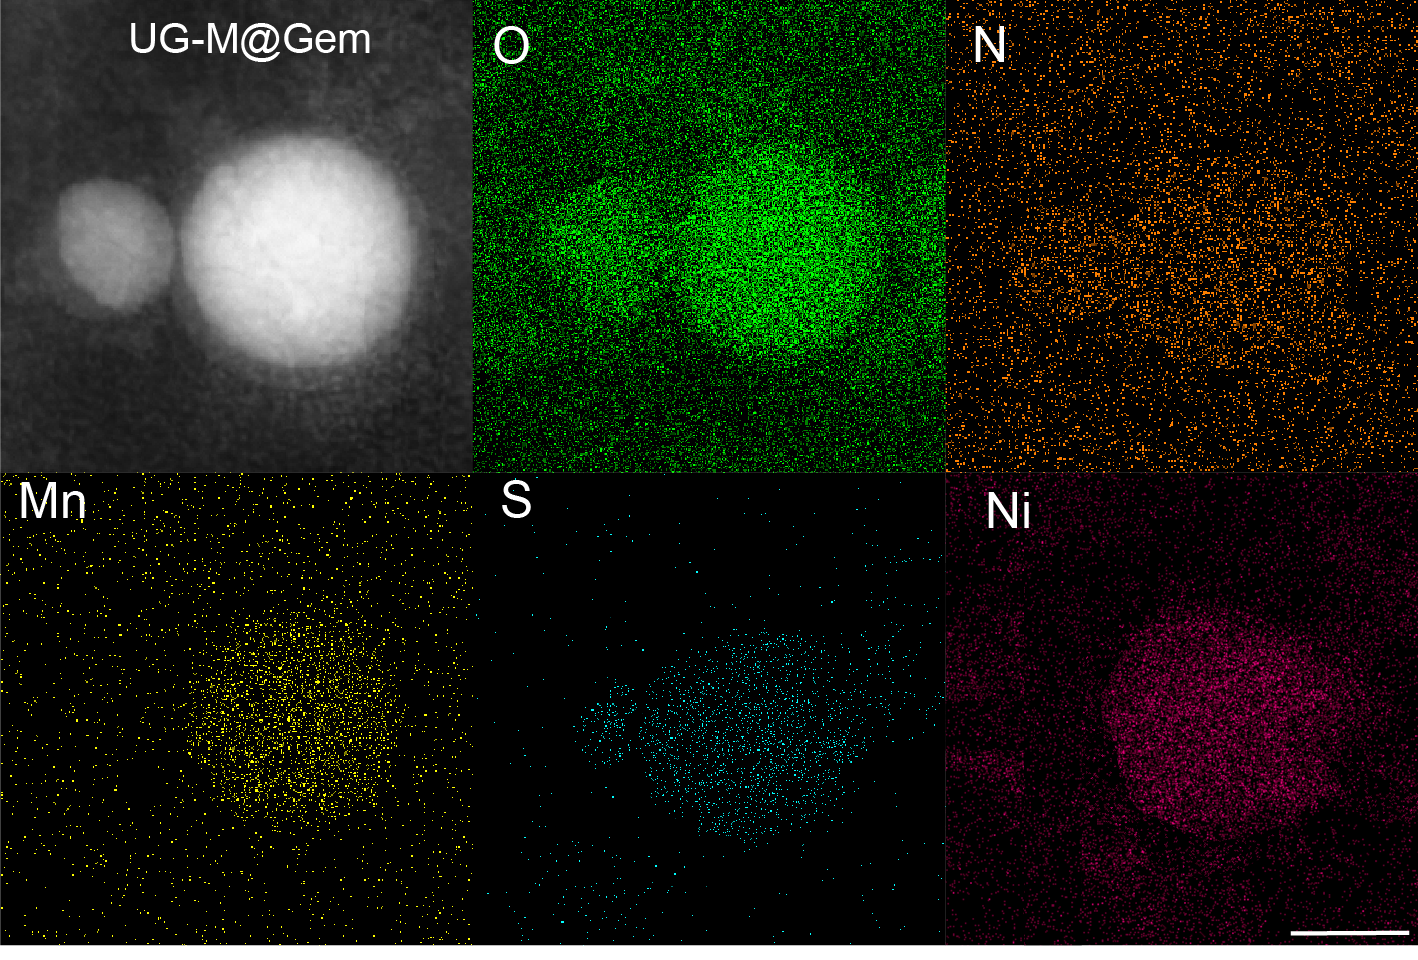


Figure S3 The element distribution in UG-M@Gem, analyzed by energy-dispersive spectroscopy, Scar bar: 100 nm.


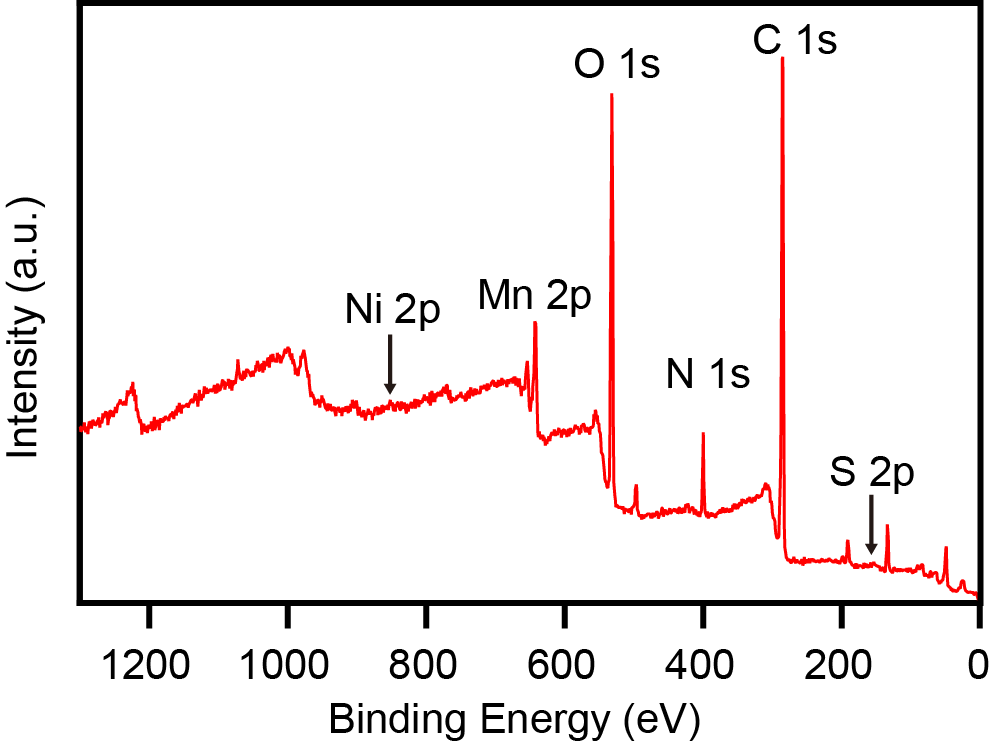


FigureS4 X-ray photoelectron spectroscopy (XPS) survey spectrum of UG-M@Gem.


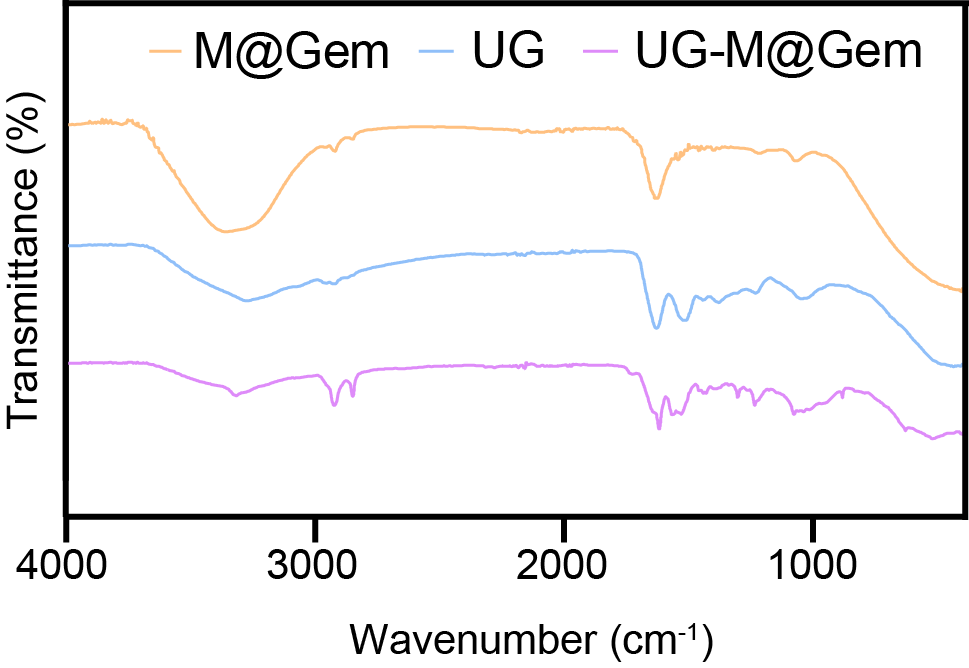


Figure S5 FTIR spectra of M@Gem, UG and UG-M@Gem.


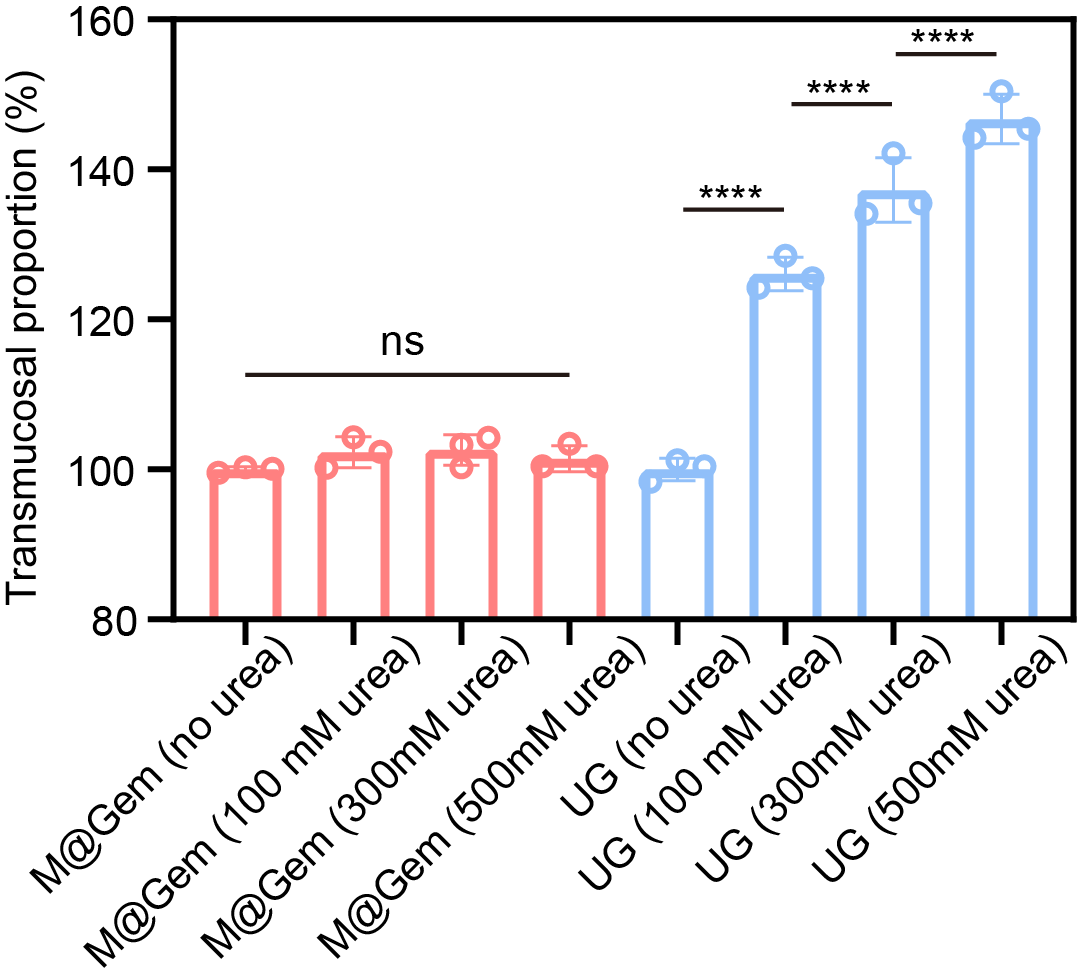


Figure S6 The Transwell assay was used to evaluate the nanoparticles efficiency. **** *p* < 0.0001, ns indicate *P* > 0.05.


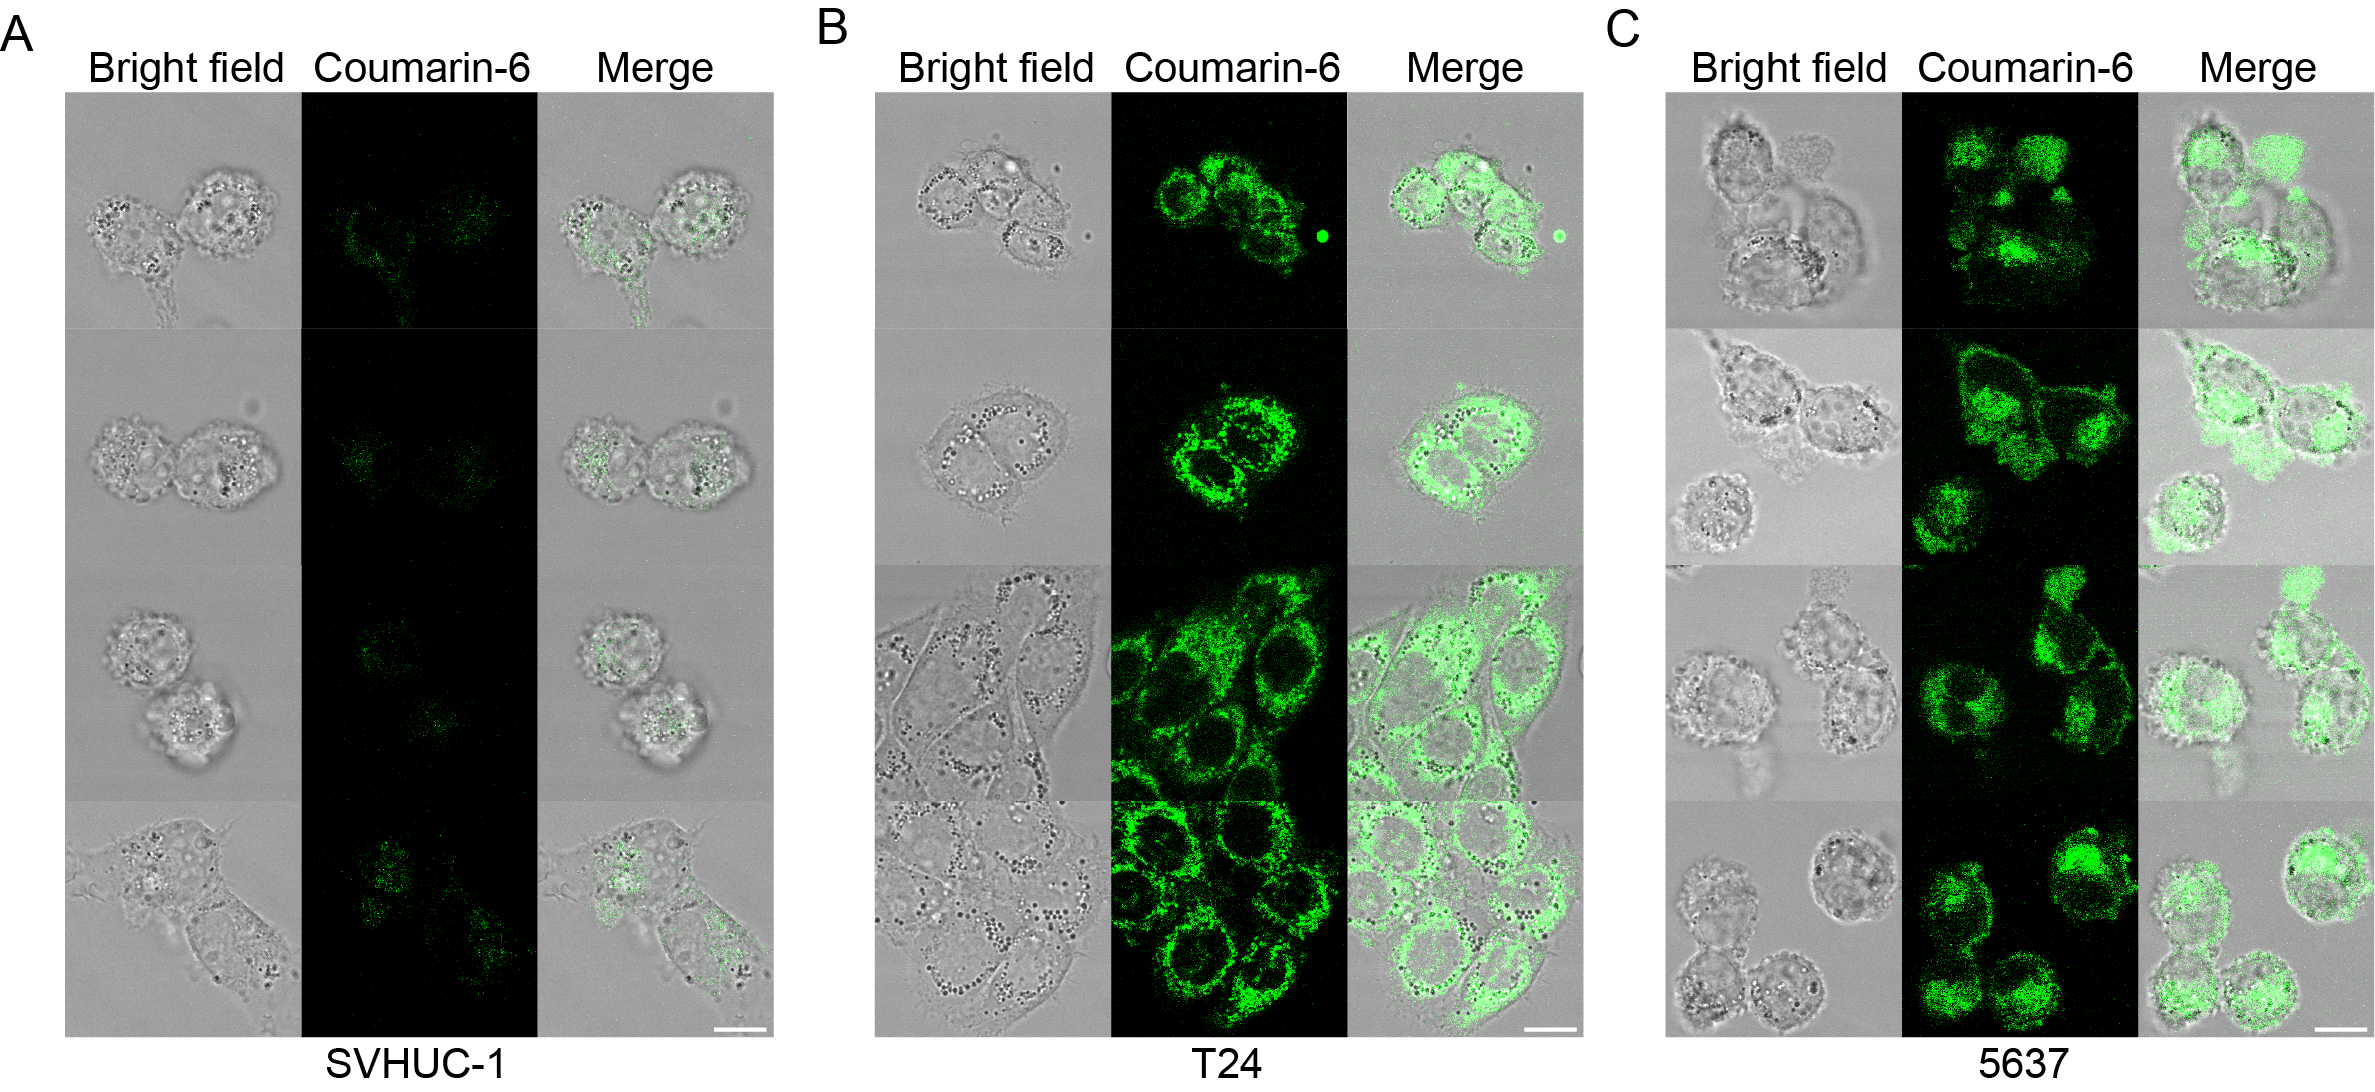


Figure S7 CLSM analysis of the BCa targeting efficiency of UG-M@Gem in SVHUC-1(A), T24(B) and 5637 (C). Supplementary images for Figure 3A. scale bar: 20 μm.


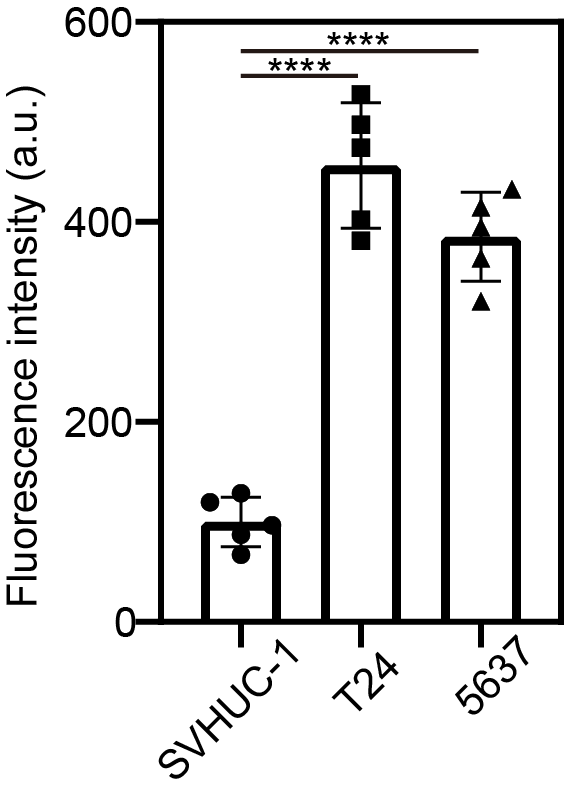
Figure S8 Statistical analysis of the BCa targeting efficiency of UG-M@Gem. **** *p* < 0.0001.


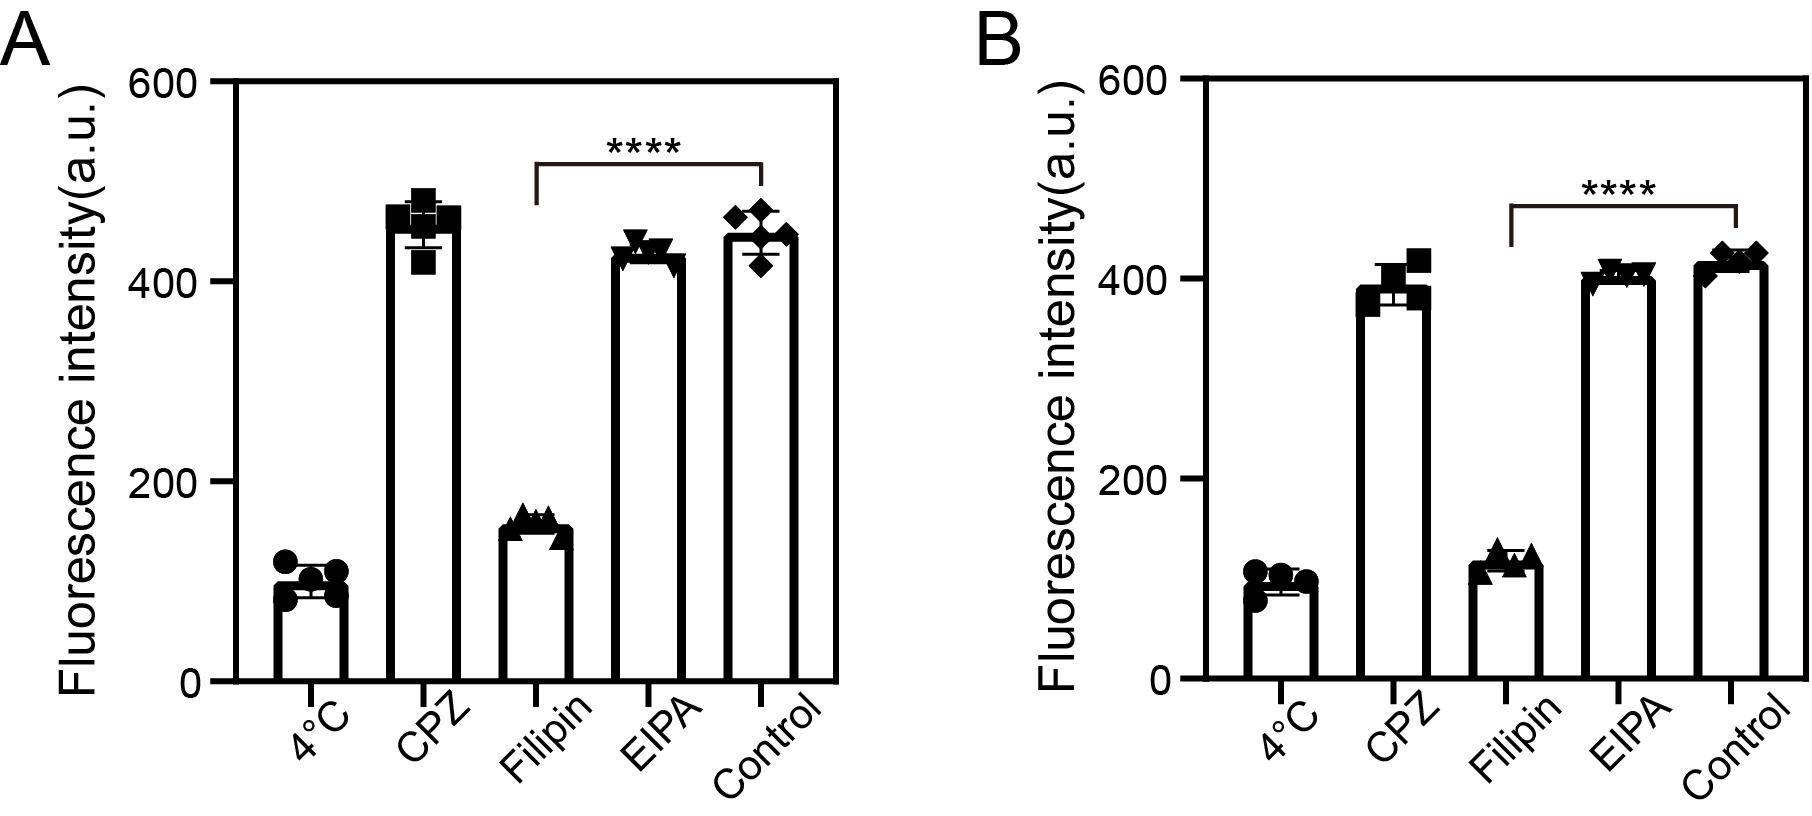
Figure S9 The endocytosis pathway of UG-M@Gem. (A) Statistical analysis of the endocytosis inhibition by different treatments in T24 and in (B) 5637. **** *p* < 0.0001.


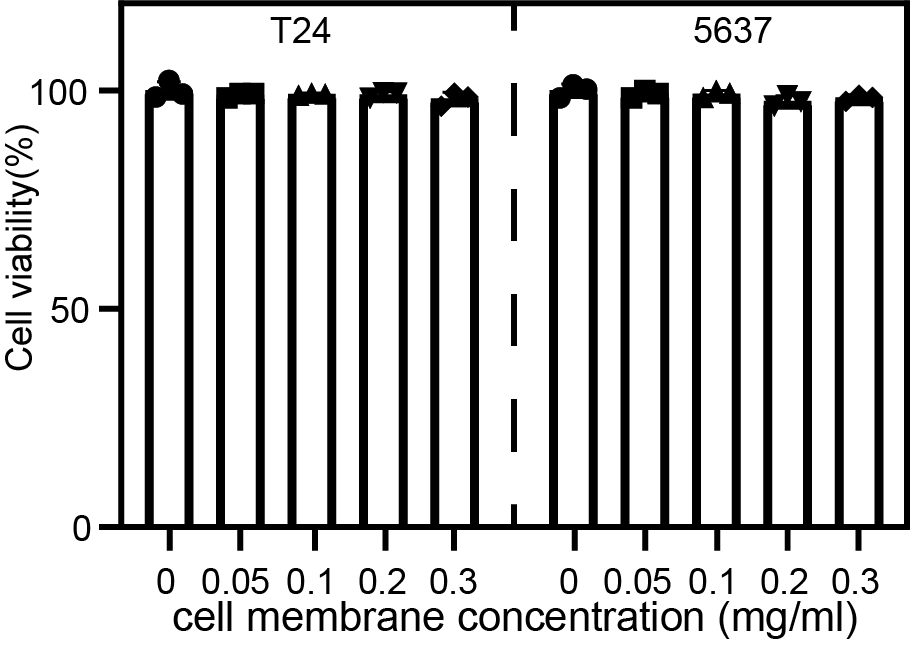


Figure S10 Anti-tumor effect of cell membrane in vitro.


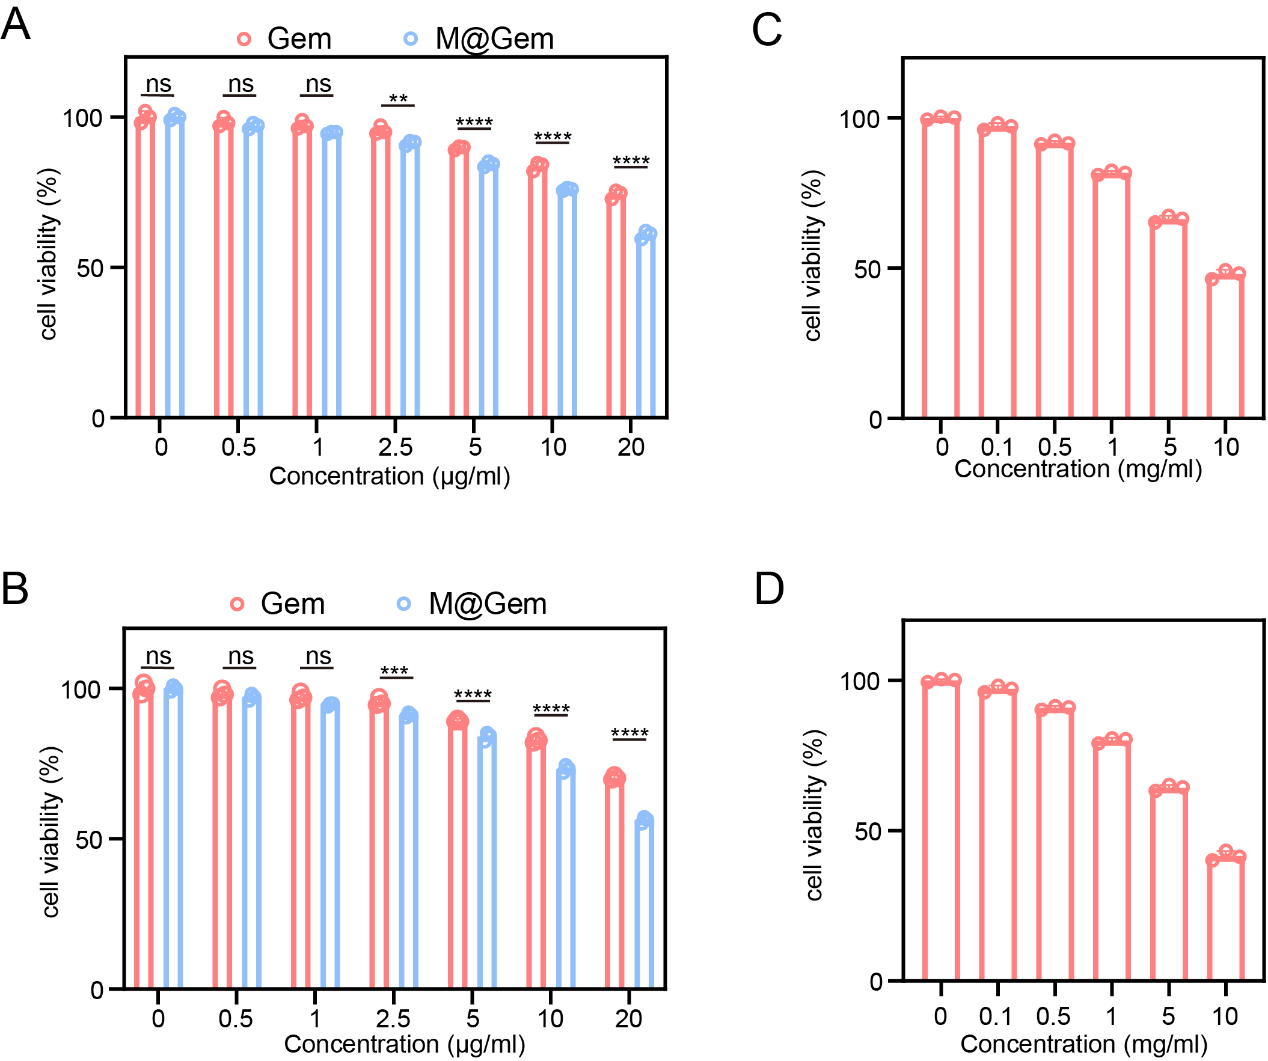


Figure S11 In vitro anticancer activity. (A) Cytotoxicity of different concentration of Gem and M@Gemfor 24 h incubation in T24. (B) Cytotoxicity of different concentration of Gem and M@Gemfor 24 h incubation in 5637. (C) Cytotoxicity of different concentration of UG for 24 h incubation in T24. (D) Cytotoxicity of different concentration of UG for 24 h incubation in 5637. ** *p* < 0.01, *** *p* < 0.001, **** *p* < 0.0001, ns indicate *P* > 0.05.
